1 **Drivers and barriers to promoting self-care in individuals living with**  
2 **multimorbidity:** a cross-sectional online survey of health and care  
3 professionals

4  
5  
6

- 7 • Susan Barber\* (1, 2), [s.barber@imperial.ac.uk](mailto:s.barber@imperial.ac.uk)  
8 Orcid No. 0000-0002-5742-9639
- 9 • Benedict Hayhoe (1), [b.hayhoe@imperial.ac.uk](mailto:b.hayhoe@imperial.ac.uk)  
10 Orcid No. 0000-0002-2645-6191
- 11 • Sonia Richardson (1, 3), [sonia.richardson@nhs.net](mailto:sonia.richardson@nhs.net)  
12 • Orcid No. 0009-0004-9559-0222
- 13 • John Norton (1, 3)
- 14 • Manisha Karki (4), [m.karki@imperial.ac.uk](mailto:m.karki@imperial.ac.uk)  
15 Orcid No. 0000-0001-6996-8915
- 16 • Austen El-Osta (4), [a.el-osta@imperial.ac.uk](mailto:a.el-osta@imperial.ac.uk)  
17 Orcid No. 0000-0002-8772-4938

18

19 (1) Imperial College London, Department of Primary Care & Public Health, National  
20 Institute for Health Research (NIHR) Applied Research Collaboration Northwest  
21 London.

22 (2) Chelsea & Westminster Hospitals NHS Foundation Trust, National Institute for  
23 Health Research (NIHR) Applied Research Collaboration Northwest London.

NOTE: This preprint reports new research that has not been certified by peer review and should not be used to guide clinical practice.

24 (3) Imperial College London, Department of Primary Care & Public Health, Public  
25 Partner in National Institute for Health Research (NIHR) Applied Research  
26 Collaboration Northwest London.

27 (4) Self-Care Academic Research Unit (SCARU), Imperial College London School  
28 of Public Health

29

30

31 \*Corresponding author

32 Susan Barber, [s.barber@imperial.ac.uk](mailto:s.barber@imperial.ac.uk)

33

34

## 35 Abstract

36

### 37 Objective

38 Investigate knowledge, attitudes, and perceptions of health and care professionals  
39 (H&CPs) in England concerning drivers and barriers for promoting self-care in service-  
40 users with multimorbidity.

41

### 42 Design

43 A cross-sectional online survey of the health and care workforce.

44

### 45 Setting

46 Health and social care workforce.

47

## 48 **Participants**

49 Eighty-eight health and social care professionals in England.

50

## 51 **Methods**

52 A cross-sectional online survey administered via Imperial College Qualtrics platform.

53 Questions were asked about perceived drivers and barriers to promoting self-care in

54 individuals with multimorbidity, including mental health.

55

## 56 **Results**

57 Extant barriers associated with service-users ability and opportunity to self-care were

58 feelings of loneliness and social isolation (18.9%; n=61), mobility and access issues

59 (14%; n=45). Strategies deployed by H&CPs to support self-care were social

60 prescribing (17.9%; n=59), helping service-users to monitor their symptoms (15.2%;

61 n=50), referring to recognised programmes to support self-management (13.9%;

62 n=46), knowledge and understanding about the benefits of self-care (91.8%; n=67),

63 the purposes of prescribed medicines (83.3%; n=60), and support for self-care

64 (91.7%; n=66) were considered key drivers of successful self-management and to

65 engagement between service-users and service providers. Service providers'

66 reported gaps in their knowledge including how to improve practical interactions to

67 sustain health seeking behaviours by service-users (30.6%; n=49), health coaching

68 (21.9%; n=35), improved understanding about effective self-care interventions

69 (21.3%; n=34) and improving self-care in relation to medicines use (20%; n=32). Most

70 respondents (92.2%; n=71) reported that the COVID-19 pandemic had highlighted the

71 need for self-care, and (42.7%; n=32) agreed that the pandemic had a positive impact

72 on their ability to promote self-care among service-users.

73

## 74 **Conclusions**

75 Self-care is important for service-users who live with multimorbidity. H&CPs are in a  
76 unique position to influence lifestyle choices and health-seeking self-care behaviours.  
77 Raising awareness about the importance of self-care, health literacy, knowledge,  
78 understanding and skills among service-users and providers is key to improving  
79 supported self-care.

80

## 81 **Key Words**

82 Self-care, multimorbidity, COVID-19, professional education

83

84

# 85 **Introduction**

86 Increasing numbers of people live with multimorbidity (MM), defined as the  
87 coexistence of two or more chronic health conditions in the same individual (1–3).  
88 Service-users with multimorbidity must cope with a complex array of associated  
89 issues, including the effects of the health conditions themselves, a higher treatment  
90 burden, polypharmacy, multiple health care appointments, psychosocial issues, and  
91 stress (4,5).

92

93 Self-care may assist individuals with multimorbidity in meeting some of these needs.  
94 Among the positive outcomes of supported self-care for individuals living with MM are  
95 improved self-efficacy, independence in daily activities, quality of life, goal  
96 achievement (6), improved depression scores (7), diet (8), and composite measures

97 of glycaemic control, blood pressure, lipids, and depression scores (7,9). Of particular  
98 importance in the context of stretched health services is the potential for reduced use  
99 of health services, hospital admissions and emergency services (10–12), and  
100 prevention of illness progression (13).

101

102 Providers of health and social care utilise a variety of interventions to support  
103 individuals with multimorbidity, including the deployment of strength-based  
104 approaches (14–16), the promotion of self-care, and self-management strategies  
105 (17). Examples include access to local assets such as local community services,  
106 information and support, signposting and social prescribing, use of shared decision-  
107 making, and alternative person-centred approaches to promote patient activation and  
108 self-care (14–17).

109

110 Health and care professionals (H&CPs) who are well trained and organised are likely  
111 to respond better to the challenges of supporting people with multimorbidity to self-  
112 care (13). There is a need to reform the way the healthcare system can deliver care,  
113 train, and re-skill H&CPs, with a focus on the development of necessary working  
114 relationships designed to support service-users to self-care (18,19). Multiple barriers  
115 have been identified to supporting self-care among individuals with multimorbidity  
116 (20–23), such as complex psychosocial and cultural barriers and practicalities relating  
117 to roles and responsibilities among service-users and health and social care providers  
118 (24).

119

120 **Study rationale**

121 There is little comparative research available to guide our understanding of what the  
122 health and social care workforce consider as drivers and barriers to good quality  
123 supported self-care for people who live with multimorbidity. Understanding how the  
124 self-care agenda is being supported by H&CPs is important. Whilst many studies have  
125 focused on challenges and outcomes of self-care interventions (6–11,13), to our  
126 knowledge this is the first to focus on the knowledge, attitudes and perceptions of  
127 H&CPs about extant barriers. National guidance calls for H&CPs to support self-care  
128 as part of personalised care across the health and care system (18,25), whilst  
129 international guidance calls for personalised and supported self-care to be considered  
130 as a key to improving patient safety (2). National guidance suggests that this requires  
131 a shift in relationships between H&CPs and people, in which all the person's health  
132 conditions and needs are considered together, and in which that person's own skills,  
133 strengths and attributes are taken into account (18). Little is known about the  
134 additional needs of H&CPs to help deliver this.

135

### 136 **Study objectives**

137 This study aimed to investigate the knowledge, attitudes, and perceptions (KAP) of  
138 H&CPs in England concerning extant barriers and drivers to promote self-care among  
139 service-users with multimorbidity.

140

## 141 **Methods**

### 142 **Study design**

143 We conducted a cross-sectional online survey of H&CPs in England about their  
144 knowledge, attitudes, and perceptions (KAP), drivers and barriers to promoting self-  
145 care in service-users.

146

147 The link to the electronic open survey was published and available on the Imperial  
148 College Qualtrics platform between 5 February 2021 and 18 August 2021; the survey  
149 could be accessed by anyone with a link. Potentially eligible participants received an  
150 invitation email, including a Participant Information Sheet and link to the survey, from  
151 the study team; the first question in the survey requested informed consent from the  
152 participant after which the survey could be completed. Completion of the survey was  
153 voluntary. No incentives to complete it were offered. Co-investigators also  
154 disseminated the email to their professional networks. The data collected were stored  
155 on the Imperial College London secure database, and only the team researchers  
156 could access the survey results.

157

158 The survey comprised a total of 17 questions and was accessible using a personal  
159 computer or smartphone. The questions were displayed on one page with a progress  
160 bar. Some questions invited respondents to tick more than one response where that  
161 was appropriate, hence not all the results add up to 100%. Participants could review  
162 their answers before submitting them. Website cookies were used to assign a unique  
163 user identifier to each client computer. Duplicate database entries having the same  
164 user ID were eliminated before analysis. All data collected through the survey were  
165 anonymised and not personally identifiable. The online survey's technical functionality  
166 was tested before being published.

167

168 Drivers and barriers for the health and social care workforce to promote self-care in  
169 individuals living with MM were evaluated by establishing participants' professional  
170 experiences of providing services for individuals with MM. This was explored through  
171 questions estimating the proportion of service-users with MM, their most common  
172 needs, and the methods used by respondents to promote self-care to manage  
173 service-user's conditions. Several questions on training were also asked, as well as  
174 questions exploring perceived gaps in H&CPs education. Most questions were  
175 multiple choice, but a variety of formats were used, including statements rated against  
176 Likert-style scales. Questions frequently offered the option to add free text  
177 clarification.

178

### 179 **Statistical analysis**

180 Quantitative data were collected using an eSurvey questionnaire administered on  
181 Qualtrics. Survey responses were summarised using frequencies and percentages.  
182 All analyses were performed using SPSS (Statistical Package for Social Sciences)  
183 version 28.0.1). The quality of the survey was assessed by completing the Checklist  
184 for Reporting Results of Internet E-Surveys (CHERRIES) (26).

185

### 186 **Ethics**

187 The study was reviewed and received a favourable opinion from Imperial College  
188 Research Ethics Committee (ICREC # 21IC6770). All data generated or analysed  
189 during this study are included in this published article.

190

### 191 **Consent**



192 The first question in the eSurvey was to seek consent. Full information about the study  
193 was given and consent was sought from each participant. The right of the participant  
194 to refuse to participate without giving reasons was respected. All participants were free  
195 to withdraw at any time and without giving reasons. Participants were notified of the  
196 publication plans and reminded that all their data was pseudonymised.

197

### 198 **Patient and Public Involvement**

199 No patients were involved. Co-authors Sonia Richardson and John Norton are  
200 experienced Public Partners, attached to the NIHR ARC NWL Multimorbidity and  
201 Mental Health Theme. They contributed to developing the survey questions, and  
202 reviewed the manuscript, critically commenting on the main results and discussion  
203 points.

204

## 205 **Results**

### 206 **Demographic profile of respondents**

207 The total number of respondents was adjusted from 88 to 81, as 7 individuals  
208 consented but did not provide responses to the survey question. The survey captured  
209 responses from 81 H&CPs in the UK. Most (66.7%, n=48) were female, and the  
210 majority (76.4%; n=55) were from a white background. Thirty-seven percent (n=30)  
211 were allied health professionals; from whom 13.5% (n=12) were occupational  
212 therapists; 20.2% (n=18) were other allied health professionals; 19.1% (n= 17) were  
213 from a variety of other occupations which were not disclosed, and 15.7% (n=14) were  
214 general practitioners. The remainder were nursing (9%; n=8), social care staff (5.6%;  
215 n=5), social prescribers (4.5%; n=4), pharmacists (4.5%; n=4), secondary care

216 consultants (2.2%; n=2), advocacy workers (2.2%; n=2), health coach (1.1%; n=1)  
217 health care assistant (1.1%; n=1), and rehabilitation staff (1.1%; n=1).

218

219 Not all participants responded to every question hence the total number of responses  
220 to each question described in tables 1 and 2 does not always add up to 81. **Table 1.**

221

222 **Table 1: Respondent Characteristics**

|                     | <b>N</b> | <b>(%)</b> |
|---------------------|----------|------------|
| <b>Age</b>          |          |            |
| 20-29               | 10       | (14.2)     |
| 30-39               | 11       | (15.8)     |
| 40-49               | 16       | (22.9)     |
| 50-59               | 29       | (41.4)     |
| 60 & over           | 4        | (5.7)      |
| <b>Gender</b>       |          |            |
| Male                | 23       | (31.9)     |
| Female              | 48       | (66.7)     |
| Other               | 1        | (1.4)      |
| <b>Ethnicity</b>    |          |            |
| White               | 55       | (76.4)     |
| Black/Black British | 3        | (4.2)      |
| Asian/Asian British | 9        | (12.5)     |
| Mixed               | 1        | (1.4)      |
| Other               | 1        | (1.4)      |
| Prefer not to say   | 3        | (4.2)      |
| <b>Occupation</b>   |          |            |
| GP                  | 14       | (15.7)     |
| Nurse               | 8        | (9.0)      |

|                                 |    |        |
|---------------------------------|----|--------|
| Allied Health Care Professional | 18 | (20.2) |
| Health coach                    | 1  | (1.1)  |
| Social care                     | 5  | (5.6)  |
| Rehabilitation                  | 1  | (1.1)  |
| Social prescriber               | 4  | (4.5)  |
| Advocacy worker                 | 2  | (2.2)  |
| Health care assistant           | 1  | (1.1)  |
| Occupational therapy            | 12 | (13.5) |
| Pharmacist                      | 4  | (4.5)  |
| Hospital physician              | 2  | (2.2)  |
| Other                           | 17 | (19.1) |

---

223

#### 224 **Service-user identification and their most common needs**

225 More than half (65.4%; n=51) of H&CPs estimated that their patients had  
226 multimorbidity (MM), defined as two or more long-term health conditions. Most  
227 respondents (65.4%; n=70) provided services to identify and support self-care for  
228 people living with MM. Respondents indicated that almost half of service-users  
229 (40.7%; n=59) were referred directly to the service, whilst 20% (n=29) engaged with  
230 the provider following self-referral.

231

232 The needs that were most associated with service-users with MM were related to  
233 loneliness and social isolation (18.9%; n=61), mobility and access issues (14%; n=45),  
234 and support to understand or comply with a medical regimen (9.9%; n=32).

235

#### 236 **Factors affecting service-users' ability to self-care**

237 Factors perceived to positively affect service-users' ability to self-care included: a good  
238 understanding of the benefits of self-care (91.8%; n=67), receiving support to help

239 improve lifestyle limitations caused by physical/mental health conditions (91.7%;  
240 n=66), receiving support to improve mental health and wellbeing (87.7%; n=64) and  
241 receiving support via services such as social prescribing and to address unmet social  
242 needs, for example, housing (87.7%; n=64).

243

244 Factors perceived to impact service-users' ability most negatively to self-care included  
245 low motivation (94.5% n=69), lack of knowledge about self-care activities (90.4%  
246 n=66), and low empowerment (89%; n=65). Additionally, (80.6% n=58) indicated that  
247 a lack of positive feedback had a negative impact on service user's ability self-care.  
248 Many respondents highlighted a lack of support from family/carers (74%; n=54),  
249 healthcare professionals (72.6%; n=53), the costs associated with self-care such as  
250 gym membership or wearable aid (67.1%; n=49), a lack of support from a community  
251 health team (66.8%; n=50) or the time needed to self-care (68.5%; n=50) all had a  
252 negative impact.

253

#### 254 **Services and strategies used to support self-care**

255 Respondents signposted service-users to other services, including social prescribing  
256 (17.9%; n=59), information services, including digital health technologies (e.g.,  
257 wearables) and decision support tools (e.g., self-testing) to help individuals monitor  
258 their own symptoms (15.2%; n=50) and other recognised programmes to support self-  
259 management (13.9%; n=46).

260

261 Over half of service providers reported that they mostly communicated with service-  
262 users either face to face (29.4%; n=74) and/or by telephone (26.2%; n=66), with fewer

263 communicating by video chat (14.9% n=36), email or letter (13.9% n=35) SMS, (11.5%  
264 n=29), other means of communication (4.8% n=12).

265

266 **Extent that health and care professionals could support people with**  
267 **multimorbidity to adopt activities across the Seven Pillars of Self-Care**

268 Most respondents felt that they and/or their organisations were enabled to support  
269 service-users "a lot" (44.6%; n=33) or by a moderate amount (37.8%; n=28) in  
270 improving health literacy levels. Respondents also felt that health and care staff were  
271 able to improve service users' mental wellbeing to varying degrees (37.7%; n=29 by a  
272 lot and 46.8%; n=36 by a moderate amount), promoting physical activity (48%; n=36  
273 by a lot, and 30.7%; n=23 by a moderate amount), improving healthy eating habits  
274 (25.7%; n=19 by a lot, and 32.4%; n=24 a moderate amount), avoiding risks (29.3%;  
275 n=22 by a lot, and 40%; n=30 to a moderate extent), improving hygiene practices  
276 (29.3%; n=22 by a lot, and 34.7%; n=26 a moderate amount), and promoting the  
277 rational use of products and services 33.3%; n=25 a lot, 34.7% (n=26) a moderate  
278 amount.

279

280 **Perceptions of responsibility and influence on the behaviour of service-users**

281 Most respondents agreed with the following statements: it is important to motivate  
282 service-users to self-care (94.8%; n=73); it is the responsibility of H&CPs to promote  
283 self-care (93.5%; n=72); they (84.0%; n=64) and their organisation (85.5%; n=65) are  
284 able to positively influence the self-care capability of service-users; service-users are  
285 more likely to make changes to their lifestyle and behaviours as a result of the support  
286 provided (84.2% n=64); H&CPs take account of service-user's personal  
287 circumstances when considering the type or level of support offered (84.2%; n=64).

288 Most respondents indicated that inequalities have a detrimental effect on people's  
289 ability to self-care (98.7%; n=76).

290

### 291 **Impact of the COVID-19 pandemic**

292 Almost all respondents (92.2%; n=71) felt that the pandemic had highlighted the  
293 importance of supporting service-users to self-care, whereas nearly half (42.7%; n=32)  
294 felt that the pandemic had a positive effect on their ability to promote self-care in  
295 service-users.

296

### 297 **The importance placed on continuing professional development**

298 The majority of respondents (82.9%; n=63) indicated that continuing professional  
299 development was a key factor in helping them to provide better support to service-  
300 users to enable self-care, but only a quarter of respondents (25.0%; n=49) had  
301 participated in education and/or training to support person-centred care, or shared  
302 decision making (19.9%; n=39 ). Only a small proportion of respondents had  
303 participated in training or received mentoring relevant to self-care (15.7% n=31),  
304 personalised care (14.5%; n=29), social prescribing (10.7%; n=21) or lifestyle  
305 medicine (9.2%; n=18).

306

307 Many respondents identified gaps in their knowledge, especially in relation to  
308 improving their understanding and skills to support service-users to sustain health  
309 seeking behaviour (30.6%; n=49), or coaching service-users to self-care (21.9%;  
310 n=35). When ranking areas of knowledge for improvement, respondents said that  
311 knowledge about self-care interventions, empowerment and coaching service-users,

312 and the practicalities of sustaining health seeking behaviours were the most important  
313 to them.

314

315 **Table 2: Survey Results**

|                                                                                                         | N  | (%)    |
|---------------------------------------------------------------------------------------------------------|----|--------|
| <b>Need for self-care for individuals with multimorbidity most commonly identified in your service?</b> |    |        |
| Direct referrals (e.g., GP, Out of Hospital, Mental health services)                                    | 59 | (40.7) |
| Use a patient database/stratification according to a type of condition                                  | 15 | (10.3) |
| Algorithm/segmentation to prioritise specific cohort(s) of service-users                                | 7  | (4.8)  |
| Drop-in service / signposting from community                                                            | 15 | (10.3) |
| Service-user self-referrals                                                                             | 29 | (20.0) |
| Not applicable - my service is not concerned with identifying self-care needs                           | 2  | (1.4)  |
| Other                                                                                                   | 18 | (12.4) |
| <b>Estimated proportion of service-users that have have two or more long-term health conditions</b>     |    |        |
| 0-20%                                                                                                   | 4  | (5.1)  |
| 21-40%                                                                                                  | 14 | (17.9) |
| 41-60%                                                                                                  | 9  | (11.5) |
| 61-80%                                                                                                  | 28 | (35.9) |
| 81-100%                                                                                                 | 23 | (29.5) |
| <b>What are the most common needs of your service-users with multimorbidity?</b>                        |    |        |
| Computer/technical literacy                                                                             | 29 | (9.0)  |
| Support to understand or comply with medical regimen                                                    | 32 | (9.9)  |
| Housing                                                                                                 | 26 | (8.1)  |
| Caring responsibilities                                                                                 | 27 | (8.4)  |
| Social isolation & loneliness                                                                           | 61 | (18.9) |
| The cost of items required to self-care                                                                 | 14 | (4.3)  |
| Access & mobility                                                                                       | 45 | (14.0) |
| Need for advocate                                                                                       | 16 | (5.0)  |
| Need for interpreter/ translator                                                                        | 17 | (5.3)  |
| Information about medicines                                                                             | 17 | (5.3)  |
| Support for end-of-life care                                                                            | 18 | (5.6)  |
| Other                                                                                                   | 20 | (6.2)  |

**TO WHAT EXTENT DO YOU FEEL THAT YOU/ THE SERVICE IS CURRENTLY ENABLED TO SUPPORT USERS IN THE FOLLOWING?**

**Promoting knowledge & health literacy**

|                   |    |        |
|-------------------|----|--------|
| A little          | 13 | (17.6) |
| A moderate amount | 28 | (37.8) |
| A Lot             | 33 | (44.6) |

**Improving mental wellbeing**

|                   |    |        |
|-------------------|----|--------|
| A little          | 12 | (15.6) |
| A moderate amount | 36 | (46.8) |
| A Lot             | 29 | (37.7) |

**Promoting physical activity**

|                   |    |        |
|-------------------|----|--------|
| A little          | 16 | (21.3) |
| A moderate amount | 23 | (30.7) |
| A Lot             | 36 | (48.0) |

**Improving healthy eating habits**

|                   |    |        |
|-------------------|----|--------|
| A little          | 31 | (41.9) |
| A moderate amount | 24 | (32.4) |
| A Lot             | 19 | (25.7) |

**Risk avoidance**

|                   |    |        |
|-------------------|----|--------|
| A little          | 23 | (30.7) |
| A moderate amount | 30 | (40.0) |
| A Lot             | 22 | (29.3) |

**Practising good hygiene**

|                   |    |        |
|-------------------|----|--------|
| A little          | 27 | (36.0) |
| A moderate amount | 26 | (34.7) |
| A Lot             | 22 | (29.3) |

**Rational and responsible use of products & services**

|                   |    |        |
|-------------------|----|--------|
| A little          | 24 | (32.0) |
| A moderate amount | 26 | (34.7) |
| A Lot             | 25 | (33.3) |

**Methods used to help promote self-care for people with multimorbidity**

|                                                             |    |        |
|-------------------------------------------------------------|----|--------|
| Recommend a recognised programme to support self-management | 46 | (13.9) |
| Shared decision-making aid (e.g., Needs Assessment Tool)    | 33 | (10.0) |



|                                                                                                                                         |    |        |
|-----------------------------------------------------------------------------------------------------------------------------------------|----|--------|
| Helping patients to monitor their symptoms and know when to take action (including wearables & self-testing)                            | 50 | (15.2) |
| Social prescribing or signposting to suitable services                                                                                  | 59 | (17.9) |
| Motivational interviewing                                                                                                               | 32 | (9.7)  |
| Peer to peer support (e.g. health buddy)                                                                                                | 22 | (6.7)  |
| IAPT or other community based mental health service                                                                                     | 28 | (8.5)  |
| Provision of information about (please specify):                                                                                        | 33 | (10.0) |
| Recognised model of collaborative care planning (please specify):                                                                       | 14 | (4.2)  |
| Other (please specify):                                                                                                                 | 13 | (3.9)  |
| <b>Which methods of communication do you use when supporting service-users to self-care?</b>                                            |    |        |
| Face-to-face                                                                                                                            | 74 | (29.4) |
| Telephone                                                                                                                               | 66 | (26.2) |
| SMS                                                                                                                                     | 29 | (11.5) |
| E-mail/ Letter                                                                                                                          | 35 | (13.9) |
| Video chat                                                                                                                              | 36 | (14.3) |
| Other:                                                                                                                                  | 12 | (4.8)  |
| <b>TO WHAT EXTENT DO YOU AGREE WITH THE FOLLOWING STATEMENTS?</b>                                                                       |    |        |
| <b>It is important to motivate service-users to self-care</b>                                                                           |    |        |
| Disagree                                                                                                                                | 1  | (1.3)  |
| Neutral                                                                                                                                 | 3  | (3.9)  |
| Agree                                                                                                                                   | 73 | (94.8) |
| <b>Self-care is the responsibility of service-users themselves</b>                                                                      |    |        |
| Disagree                                                                                                                                | 9  | (11.7) |
| Neutral                                                                                                                                 | 24 | (31.2) |
| Agree                                                                                                                                   | 44 | (57.1) |
| <b>It is the responsibility of the healthcare professionals to promote self-care</b>                                                    |    |        |
| Disagree                                                                                                                                | 1  | (1.3)  |
| Neutral                                                                                                                                 | 4  | (5.2)  |
| Agree                                                                                                                                   | 72 | (93.5) |
| <b>The service-user's level of self-confidence is an important factor in determining the extent to which they self-care effectively</b> |    |        |
| Disagree                                                                                                                                | 8  | (10.4) |
| Neutral                                                                                                                                 | 69 | (89.6) |

|                                                                                                                                            |    |        |
|--------------------------------------------------------------------------------------------------------------------------------------------|----|--------|
| Agree                                                                                                                                      | 0  | (0)    |
| <b>I/ my organisation can influence the service-user's capabilities to self-care</b>                                                       |    |        |
| Disagree                                                                                                                                   | 2  | (2.6)  |
| Neutral                                                                                                                                    | 9  | (11.8) |
| Agree                                                                                                                                      | 65 | (85.5) |
| <b>I am able to influence the self-care capability of my service-users</b>                                                                 |    |        |
| Disagree                                                                                                                                   | 2  | (2.6)  |
| Neutral                                                                                                                                    | 10 | (13.2) |
| Agree                                                                                                                                      | 64 | (84.2) |
| <b>Service-users are more likely to make changes to their lifestyle &amp; behaviours as a result of the support provided by my service</b> |    |        |
| Disagree                                                                                                                                   | 3  | (3.9)  |
| Neutral                                                                                                                                    | 9  | (11.8) |
| Agree                                                                                                                                      | 64 | (84.2) |
| <b>I take into account the service-user's personal circumstances when considering the type or level of support I provide to them</b>       |    |        |
| Disagree                                                                                                                                   | 3  | (3.9)  |
| Neutral                                                                                                                                    | 9  | (11.8) |
| Agree                                                                                                                                      | 64 | (84.2) |
| <b>Inequalities can have a detrimental effect on people's ability to self-care</b>                                                         |    |        |
| Disagree                                                                                                                                   | 1  | (1.3)  |
| Neutral                                                                                                                                    | 0  | (0)    |
| Agree                                                                                                                                      | 76 | (98.7) |
| <b>The COVID-19 pandemic has highlighted the importance of supporting service-users to self-care</b>                                       |    |        |
| Disagree                                                                                                                                   | 1  | (1.3)  |
| Neutral                                                                                                                                    | 5  | (6.5)  |
| Agree                                                                                                                                      | 71 | (92.2) |
| <b>The current pandemic has had a positive effect on my ability to promote self-care with service-users</b>                                |    |        |
| Disagree                                                                                                                                   | 17 | (22.7) |
| Neutral                                                                                                                                    | 26 | (34.7) |
| Agree                                                                                                                                      | 32 | (42.7) |

**Continuing Professional Development (CPD) is important to help me provide**

**better self-care support**

|          |    |        |
|----------|----|--------|
| Disagree | 1  | (1.3)  |
| Neutral  | 12 | (15.8) |
| Agree    | 63 | (82.9) |

**Have you participated in any education or training, or have you been mentored to develop your knowledge & skills in relation to the following?**

|                                                   |    |        |
|---------------------------------------------------|----|--------|
| Lifestyle medicine                                | 18 | (9.2)  |
| Self-care                                         | 31 | (15.8) |
| Personalised care                                 | 29 | (14.8) |
| Person-centred care                               | 49 | (25.0) |
| Social prescribing                                | 21 | (10.7) |
| Advanced communication for shared decision making | 39 | (19.9) |
| Other                                             | 9  | (4.6)  |

**Have you identified any gaps in your own knowledge that could help you promote self-care in service-users?**

|                                                         |    |        |
|---------------------------------------------------------|----|--------|
| Knowledge about effective self-care interventions       | 34 | (21.3) |
| How to improve compliance/ adherence to medical regimen | 32 | (20.0) |
| Empowerment/ coaching service-users                     | 35 | (21.9) |
| Practicalities/ sustaining health-seeking behaviours    | 49 | (30.6) |
| Other                                                   | 7  | (4.4)  |
| None                                                    | 3  | (1.9)  |

**IN YOUR EXPERIENCE, WHICH OF THE FOLLOWING NEGATIVELY AFFECT SERVICE-USERS' ABILITY TO SELF-CARE?**

**Lack of knowledge about self-care activities**

|          |    |        |
|----------|----|--------|
| Agree    | 66 | (90.4) |
| Neutral  | 4  | (5.5)  |
| Disagree | 3  | (4.1)  |

**Time available to self-care**

|          |    |        |
|----------|----|--------|
| Agree    | 50 | (68.5) |
| Neutral  | 9  | (12.3) |
| Disagree | 14 | (19.2) |

**Lack of positive feedback**

|                                                                                   |    |        |
|-----------------------------------------------------------------------------------|----|--------|
| Agree                                                                             | 58 | (80.6) |
| Neutral                                                                           | 7  | (9.7)  |
| Disagree                                                                          | 7  | (9.7)  |
| <b>Low motivation</b>                                                             |    |        |
| Agree                                                                             | 69 | (94.5) |
| Neutral                                                                           | 2  | (2.7)  |
| Disagree                                                                          | 2  | (2.7)  |
| <b>Low empowerment</b>                                                            |    |        |
| Agree                                                                             | 65 | (89.0) |
| Neutral                                                                           | 6  | (8.2)  |
| Disagree                                                                          | 2  | (2.7)  |
| <b>Costs (e.g., wearables, gym subscription)</b>                                  |    |        |
| Agree                                                                             | 53 | (72.6) |
| Neutral                                                                           | 13 | (17.8) |
| Disagree                                                                          | 7  | (9.6)  |
| <b>Lack of support from healthcare professionals</b>                              |    |        |
| Agree                                                                             | 52 | (71.2) |
| Neutral                                                                           | 15 | (20.5) |
| Disagree                                                                          | 6  | (8.2)  |
| <b>Lack of support from family/carers</b>                                         |    |        |
| Agree                                                                             | 54 | (74.0) |
| Neutral                                                                           | 13 | (17.8) |
| Disagree                                                                          | 6  | (8.2)  |
| <b>Lack of support from community mental health team</b>                          |    |        |
| Agree                                                                             | 49 | (67.1) |
| Neutral                                                                           | 20 | (27.4) |
| Disagree                                                                          | 4  | (5.5)  |
| <b>WHICH FACTORS DO YOU BELIEVE POSITIVELY AFFECT SERVICE-USERS TO SELF-CARE?</b> |    |        |
| <b>Good understanding of benefits of self-care</b>                                |    |        |
| Agree                                                                             | 67 | (91.8) |
| Neutral                                                                           | 3  | (4.1)  |
| Disagree                                                                          | 3  | (4.1)  |
| <b>Desire to prevent non-communicable diseases</b>                                |    |        |

|                                                                                   |    |        |
|-----------------------------------------------------------------------------------|----|--------|
| Agree                                                                             | 46 | (63.0) |
| Neutral                                                                           | 20 | (27.4) |
| Disagree                                                                          | 7  | (9.6)  |
| <b>Access to remote monitoring &amp; other technology</b>                         |    |        |
| Agree                                                                             | 46 | (63.0) |
| Neutral                                                                           | 22 | (30.1) |
| Disagree                                                                          | 5  | (6.8)  |
| <b>Support to help improve mental health &amp; wellbeing</b>                      |    |        |
| Agree                                                                             | 64 | (87.7) |
| Neutral                                                                           | 6  | (8.2)  |
| Disagree                                                                          | 3  | (4.1)  |
| <b>Knowledge about the purposes of the medicines prescribed</b>                   |    |        |
| Agree                                                                             | 60 | (83.3) |
| Neutral                                                                           | 10 | (13.9) |
| Disagree                                                                          | 2  | (2.8)  |
| <b>Social prescribing support (e.g., housing etc.,)</b>                           |    |        |
| Agree                                                                             | 64 | (87.7) |
| Neutral                                                                           | 7  | (9.6)  |
| Disagree                                                                          | 2  | (2.7)  |
| <b>Support to help improve lifestyle limitations caused by a health condition</b> |    |        |
| Agree                                                                             | 66 | (91.7) |
| Neutral                                                                           | 3  | (4.2)  |
| Disagree                                                                          | 3  | (4.2)  |

---

316

## 317 Discussion

### 318 Summary of principal findings

319 The majority of health and care professionals (H&CPs) identified mobility challenges,  
320 loneliness, social isolation, and service access as key obstacles to self-care in service-  
321 users. The service-users' knowledge and understanding is a critical factor for  
322 successfully adopting self-care practices, and we reported on the widespread

323 consensus that also emerged on how societal inequalities adversely affect self-care  
324 capabilities. Positive influences on self-care efforts and outcomes included support  
325 from family, carers, or professional services. In contrast, barriers like low motivation,  
326 insufficient knowledge, lack of encouragement, and inadequate support, alongside the  
327 costs and time involved, hinder the routine uptake of self-care behaviours outside  
328 clinical environments.

329

330 H&CPs identified their strength in employing person-centered methods to boost health  
331 literacy, mental health, hygiene, physical activity, and the rational use of health  
332 products and services among service-users. Yet, only a few believed their interactions  
333 significantly influenced long-term healthy eating habits in service-users.

334

335 Continued professional development was deemed crucial, and whilst many H&CPs  
336 have received training on supporting self-care, gaps remain, particularly in strategies  
337 for practical engagement and maintaining health-seeking behaviours, such as  
338 medication adherence and the need for more evidence-based and coaching-style  
339 methods to enhance self-care skills.

340

### 341 **Interpretation and comparison with literature**

342 The COVID-19 pandemic underscored the importance of self-care, with about half the  
343 participants noting that pandemic-induced care model changes improved their support  
344 for self-care. Recent findings suggest the pandemic altered H&CPs' attitudes toward  
345 self-care, advocating for its inclusion in healthcare education to sustain these attitude  
346 shifts and boost individual empowerment in self-care. This finding is consistent with

347 the results of another study that characterised experience of the pandemic and found  
348 that it had changed healthcare professional's attitudes to self-care (27).

349

350 Earlier studies on self-care provide useful learning and detail positive outcomes from  
351 interventions to improve self-care relating to long-term conditions such as type 2  
352 diabetes (28) and specific co-morbidities such as cardiovascular disease and stroke  
353 (29), depression, diabetes, and heart disease (7). There are fewer studies that  
354 investigated the impact of supported self-care on service-users with more diverse  
355 multimorbidity. Earlier studies tend to focus on patient outcomes, rather than  
356 knowledge, attitudes, and perceptions of H&CPs. Thus, in the study reported in this  
357 paper, H&CPs reported the potential to positively influence the lifestyle and behaviour  
358 of service users in relation to certain behaviours, including exercise and good hygiene,  
359 there was less certainly reported regarding the extent that lifestyle advice could help  
360 improve healthy eating habits. This contrasts with studies of supported self-  
361 management that reported significant positive outcomes for people with multimorbidity  
362 in relation to diet (8). This may be attributed to the small number of respondents who  
363 were dieticians.

364

365 Social isolation, loneliness, a perceived lack of support to tackle lifestyle factors such  
366 as low motivation, poor knowledge about self-care activities, time constraints and  
367 associated costs could negatively impact our ability to self-care. H&CPs indicated the  
368 potential detrimental impact of inequalities on service-users with multimorbidity, and  
369 this likely underpins additional challenges for both the person with multimorbidity and  
370 the service provider. Our findings are consistent with the results of a recent study that  
371 considered the impact of inequalities on the outcomes of self-care interventions in

372 eight primary care locations among individuals with multimorbidity in Canada (30). Of  
373 the six lifestyle factors under consideration, the likelihood of improvement was no  
374 longer significant for people on lower incomes and with lower educational status in the  
375 domains of emotional wellbeing, self-monitoring and insight (30).

376

377 As other studies show, knowledge, training and preparedness on the part of H&CPs  
378 are vital to supporting self-care (13). This includes training of primary care staff on co-  
379 designing supported self-care plans which resulted in enhanced team working and the  
380 promotion of necessary behaviour change among service-users (31). Some studies  
381 identified the need for more H&CP disease-specific training alongside training to  
382 support self-care (10,32). This highlights the need to explore more opportunities to  
383 promote truly integrated care approaches by developing training and care resources  
384 with greater involvement from multidisciplinary teams and patients who live with  
385 multimorbidity (33,34). This approach can help embed learning and best practice so  
386 that patient experience and services can be improved to account for what matters most  
387 to service users (33,34).

388

### 389 **Implications for clinicians and policy makers**

390 Supported self-care is part of the NHS commitment to make personalised care  
391 business as usual across the health and care system (18,25). Supported self-care  
392 interventions are most successful if delivered as part of integrated care interventions  
393 for people living with long-term health conditions (35). This highlights the need for a  
394 shift in the relationship between H&CPs and service-users, in which the health  
395 conditions and needs of the whole person are considered together (36), and in which  
396 that person's own skills, strengths and attributes are considered (37). Guidelines on



397 supporting self-care are designed to support service providers to care for people with  
398 long-term health conditions and start from the premise that people want to have choice  
399 and control over the way their care is planned and delivered, based on what matters  
400 to them and their individual strengths, needs and preferences (18).

401

402 H&CPs reported that continuing professional development was important and some  
403 had experience of relevant training. However, the number that had completed training  
404 was small, and gaps in knowledge about how to improve practical interactions to  
405 sustain health-seeking behaviours were reported. This suggests that H&CPs require  
406 more choice of training or experience to help them to promote the uptake and  
407 sustained adoption of self-care among service-users. In the UK, NHS Learn and the  
408 Personalised Care Institute aim to address this gap by helping H&CPs to develop the  
409 knowledge and skills to support the delivery of the comprehensive model for  
410 personalised care which as a domain has a direct bearing on the self-care (38).

411

412 Additional training, learning on the job and mentoring may improve the knowledge and  
413 skills base of H&CPs. This could be linked to the development of clearer clinical  
414 guidelines (39,40), teamworking and developing a broader consensus on the key  
415 elements of self-care likely to bring positive changes (10,13,31,32,41) and could be  
416 achieved by bringing resources from services across the public sector to shape and  
417 reduce the negative impacts of the social determinants of health (42).

418

### 419 **Strengths and limitations**

420 To our knowledge, this is the first study in the UK that sought to investigate the  
421 knowledge, attitudes and perceptions of health and care professionals in the UK

422 concerning extant barriers and drivers to promote self-care among service-users with  
423 multimorbidity.

424

425 A key strength of our study is that it provided insights from a variety of service  
426 providers about what barriers continue to be challenging to individuals with  
427 multimorbidity and to the health and care professionals themselves. To our  
428 knowledge, only one other study has sought to investigate the prevailing attitude of  
429 H&CPs on self-care following the advent of the COVID-19 pandemic (27). This  
430 considered a general population of service users, while we specifically focused on a  
431 cohort of service users who live with multimorbidity. The main limitation of our study  
432 was that it only collected data from 81 respondents and for this reason, we cannot  
433 assume that the cross-sample is representative of the health and care workforce. Due  
434 to the nature of the online survey obtaining a response rate was not possible.  
435 However, the results do demonstrate that the study attracted a broad representation  
436 of roles from a range of health and social care professionals, offering a comprehensive  
437 view of the systemic challenges and facilitators in promoting self-care in the context  
438 of multimorbidity.

439

440 Understanding the needs of individuals who have multimorbidity and the needs of  
441 H&CPs who care for them is important. Our study asked H&CPs about the extent to  
442 which they were able to meet service-user's needs, the type of training they had  
443 completed and outstanding gaps in their training and experience. In addition, it elicited  
444 their perceptions about the role of service-users, and the factors that impact on  
445 service-users ability to self-care. This is important in the current policy and service  
446 provision context in which the agency of individuals with multimorbidity must be taken

447 account of in supporting the development and use of person-centred/personalised  
448 care models (19,26). The study highlighted gaps in knowledge among service  
449 providers, which, if addressed, would improve their ability to support people with  
450 multimorbidity and would be likely to improve self-care and potentially health  
451 outcomes.

452

### 453 **Outstanding questions/Implications for research**

454 More research is required to better understand the types of training or other methods  
455 of skill and knowledge acquisition by H&CPs, which could improve the support  
456 available to people living with multimorbidity. Future research could usefully focus on  
457 what might equip H&CPs to become more knowledgeable and confident in choosing  
458 strategies and interventions designed to improve motivation and meet service-users'  
459 needs.

460

461 The strategies and techniques most frequently used by respondents to our survey  
462 were social prescribing, helping service-users monitor their symptoms and know when  
463 to act, with a majority indicating the importance of service-user motivation in behaviour  
464 change. Social prescribing was designed to tackle challenges and put person-centred  
465 care centre stage. A recent study suggested that there has been limited exploration of  
466 the impact of social prescribing (43). A recent systematic literature review reported  
467 inconclusive evidence for social prescribing as an effective approach to improving  
468 health outcomes for adults experiencing multimorbidity and social deprivation in  
469 primary and community care settings (44). Further research could explore the drivers  
470 and barriers to optimal outcomes desired from social prescribing by H&CPs and  
471 service-users.

472

473 Additionally, more research into the most optimal use of communication channels may  
474 be useful. Our study suggested that communication with service-users was mostly  
475 face-to-face and by telephone, but respondents also reported the use of new  
476 communication tools e.g., video chat. New research could explore the extent to which  
477 H&CPs can influence service-user's ability to self-care if delivered remotely, and  
478 support remain person-centred and pro-active care.

479

## 480 **Conclusions**

481 Multimorbidity is increasingly becoming a global concern, primarily due to the ageing  
482 population and lifestyle changes. Knowledge and understanding on the part of service-  
483 users with multimorbidity is key to successful engagement with and uptake of  
484 evidence-based self-management and self-care interventions. Policymakers should  
485 therefore focus on ensuring that appropriate information, training, mentoring and  
486 support is available to health and care professionals and patients. The pandemic  
487 appears to have shed light on the important role that self-care could play in patients  
488 with multimorbidity, and the ensuing changes in the models of care observed may  
489 have resulted in improvements in health and care professionals' ability to support  
490 service-users in their personal self-management and self-care journey. More research  
491 is needed to understand changes resulting from the pandemic and their impact, and  
492 how these lessons can be applied to promote the sustained adoption of health-seeking  
493 self-care behaviours to tackle the rise of non-communicable diseases and  
494 multimorbidity.

495

---

496

497 **Author Contributors:** All authors provided substantial contributions to the conception  
498 design, acquisition and interpretation of study data and approved the last version of  
499 the paper. AEO took the lead in planning the study with support from co-authors.  
500 Susan Barber took the lead in drafting the manuscript with critical review and input  
501 from Benedict Hayhoe. Sonia Richardson and John Norton contributed to the survey  
502 questions and reviewed the first and final drafts of the manuscript for publication.  
503 Manisha Karki carried out the data analysis with support from Austen El Osta, Benedict  
504 Hayhoe and Susan Barber. Austen El Osta is the guarantor.

505

#### 506 **Acknowledgements**

507 The authors thank Iman Webber and Aos Alaa for supporting development of the  
508 survey, and for disseminating study information to survey respondents.

509

#### 510 **Funding**

511 Susan Barber , Benedict Hayhoe and Austen El-Osta are in part supported by the  
512 National Institute for Health and Care Research (NIHR) Applied Research  
513 Collaboration (ARC) Northwest London. The views expressed are those of the authors  
514 and not necessarily those of the NHS or the NIHR or the Department of Health and  
515 Social Care.

516

#### 517 **Patient and Public Involvement**

518 No patient was involved in the study. Co-authors Sonia Richardson and John Norton  
519 (deceased March 2023) are lay researchers who have direct and indirect experience  
520 of multimorbidity and who helped to construct and review the survey questions used  
521 in this study.

522

523 **Data sharing statement:** The data that support the findings of this study are available

524 from the corresponding author, Susan Barber, upon request.

525

526 **Competing interests:** None declared

527

## 528 REFERENCES

- 529 1. Multiple long-term conditions (multimorbidity): making sense of the evidence PUBLIC  
530 HEALTH 30.03.21 doi: [Internet]. Available from:  
531 [https://evidence.nihr.ac.uk/collection/making-sense-of-the-evidence-multiple-long-term-](https://evidence.nihr.ac.uk/collection/making-sense-of-the-evidence-multiple-long-term-conditions-multimorbidity/)  
532 [conditions-multimorbidity/](https://evidence.nihr.ac.uk/collection/making-sense-of-the-evidence-multiple-long-term-conditions-multimorbidity/)
- 533 2. World Health Organization. Multimorbidity [Internet]. Geneva: World Health  
534 Organization; 2016 [cited 2022 Nov 30]. 28 p. (Technical Series on Safer Primary Care).  
535 Available from: <https://apps.who.int/iris/handle/10665/252275>
- 536 3. Cassell A, Edwards D, Harshfield A, Rhodes K, Brimicombe J, Payne R, et al. The  
537 epidemiology of multimorbidity in primary care: a retrospective cohort study. *Br J Gen*  
538 *Pract.* 2018 Apr;68(669):e245–51.
- 539 4. Wallace E, Salisbury C, Guthrie B, Lewis C, Fahey T, Smith SM. Managing patients with  
540 multimorbidity in primary care. *BMJ* [Internet]. 2015 Jan 20 [cited 2020 Oct 19];350.  
541 Available from: <https://www.bmj.com/content/350/bmj.h176>
- 542 5. WHO. World Health Organization. 2020 [cited 2020 Nov 11]. COVID-19 significantly  
543 impacts health services for noncommunicable diseases. Available from:  
544 [https://www.who.int/news/item/01-06-2020-covid-19-significantly-impacts-health-](https://www.who.int/news/item/01-06-2020-covid-19-significantly-impacts-health-services-for-noncommunicable-diseases)  
545 [services-for-noncommunicable-diseases](https://www.who.int/news/item/01-06-2020-covid-19-significantly-impacts-health-services-for-noncommunicable-diseases)
- 546 6. Garvy J, Connolly D, Boland F, Smith S. OPTIMAL, an occupational therapy led self-  
547 management support programme for people with multimorbidity in primary care: a  
548 randomized controlled trial. *BMC Family Practice.* 2015;16(59).

- 549 7. Morgan M, Coates A, Dunbar J, Reddy A, Schlicht P, Fuller J. The TrueBlue model of  
550 collaborative care using practice nurses as case managers for depression alongside  
551 diabetes or heart disease: a randomised trial. *BMJ Open*. 2013;3(1).
- 552 8. EGB Eakin, Bull S, Riley K, Reeves M, McLaghlin M, Gutierrez S. Resources for Health: A  
553 Primary-CareBased Diet and Physical Activity Intervention Targeting Urban Latinos With  
554 Multiple Chronic Conditions. *Health Psychology*. 2007;26:392–400.
- 555 9. Katon W, Linn E, Korff VM, Simon G, Ludman E, Russo J. The Pathways Study: A  
556 randomized trial of collaborative care in patients with diabetes and depression. *Archives*  
557 *of General Psychiatry*. 2004;61(10):1042–9.
- 558 10. Pinnock H. Supported self-management for asthma. *Breathe*. 2015 Jun;11(2):98–109.
- 559 11. Toukhsati S, Jaarsma T, Babu A, Driscoll A, Hare D. Self-Care Interventions That  
560 Reduce Hospital Readmissions in Patients With Heart Failure; Towards the Identification  
561 of Change Agents. *Clin Med Insights Cardiol*. 2019 Jan;13:117954681985685.
- 562 12. Bourbeau J, Julien M, Maltez F, Rouleau M, Beaupre A, Began R, et al. Reduction of  
563 Hospital Utilization in Patients With Chronic Obstructive Pulmonary Disease. *Arch Intern*  
564 *Med* 2003;163:585-591. 2003 Mar;163:585–91.
- 565 13. Greaves CJ, Campbell JL. Supporting self-care in general practice. *GJGP*.  
566 2007;57(543):814–21.
- 567 14. Saint-Jaques MC, Turcott D, Pouliot E. Adopting a Strengths Perspective in Social  
568 Work Practice With Families in Difficulty: From Theory to Practice. *Family in Society*.  
569 2009;90(4).



- 570 15. Mirkovic J, Kristjansdottir OB, Stenberg U, Krogseth T, Stange KC, Ruland CM. Patient  
571 Insights Into the Design of Technology to Support a Strengths-Based Approach to Health  
572 Care. *JMIR Res Protoc*. 2016 Aug 24;5(3):e175.
- 573 16. Xie H. Strengths-based approach for mental health recovery. *Iran J Psychiatry Behav*  
574 *Sci*. 2013;7(2):5–10.
- 575 17. Smith SM, Wallace E, O’Dowd T, Fortin M. Interventions for improving outcomes in  
576 patients with multimorbidity in primary care and community settings. *Cochrane Effective*  
577 *Practice and Organisation of Care Group*, editor. *Cochrane Database of Systematic*  
578 *Reviews* [Internet]. 2016 Mar 15 [cited 2020 Oct 28]; Available from:  
579 <http://doi.wiley.com/10.1002/14651858.CD006560.pub3>
- 580 18. Supported self-management Summary Guide [Internet]. London: NHSE & NHSI; 2020  
581 Dec [cited 2021 Feb 16]. Available from: [https://www.england.nhs.uk/wp-](https://www.england.nhs.uk/wp-content/uploads/2020/03/supported-self-management-summary-guide.pdf)  
582 [content/uploads/2020/03/supported-self-management-summary-guide.pdf](https://www.england.nhs.uk/wp-content/uploads/2020/03/supported-self-management-summary-guide.pdf)
- 583 19. Araujo de Carvalho I, Beard J. INTEGRATED CARE FOR OLDER PEOPLE Realigning  
584 primary health care to respond to population ageing [Internet]. Geneva, Switzerland:  
585 World Health Organisation WHO; 2018. (Department of Ageing and Life Course, WHO  
586 headquarters). Available from: <https://apps.who.int/iris/handle/10665/326295>
- 587 20. Liddy C, Blazkho V, Mill K. Challenges of self-management when living with multiple  
588 chronic conditions: systematic review of the qualitative literature. *Can Fam Physician*.  
589 2014 Dec;60(12):1123–33.

- 590 21. Bayliss EA, Ellis JL, Steiner JF. Barriers to self-management and quality-of-life  
591 outcomes in seniors with multimorbidities. *Ann Fam Med*. 2007;5(5):395–402.
- 592 22. El-Osta A, Webber D, Gnani S, Barnarsee R, Mummery D, Majeed A, et al. The Self-  
593 Care Matrix: A Unifying Framework for Self-Care. 2020;608941 Bytes.
- 594 23. Franklin M, Lewis S, Willis K, Bourke-Taylor H, Smith L. Patients’ and healthcare  
595 professionals’ perceptions of self-management support interactions: Systematic review  
596 and qualitative synthesis. *Chronic Illness*. 2018 Jun;14(2):79–103.
- 597 24. Coventry PA, Fisher L, Kenning C, Bee P, Bower P. Capacity, responsibility, and  
598 motivation: a critical qualitative evaluation of patient and practitioner views about  
599 barriers to self-management in people with multimorbidity. *BMC Health Serv Res*. 2014  
600 Dec;14(1):536.
- 601 25. NHS. The NHS long term plan [Internet]. <https://www.longtermplan.nhs.uk/>; 2019.  
602 Available from: [longtermplan.nhs.uk](https://www.longtermplan.nhs.uk)
- 603 26. Eysenbach G. Improving the quality of Web surveys: the Checklist for Reporting  
604 Results of Internet E-Surveys (CHERRIES). *Journal of medical Internet research*.  
605 2004;6(3):e34-e.
- 606 27. Smith PS, Alaa A, Riboli SE, Bagkeris E, El Osta A. How has COVID-19 changed  
607 healthcare professionals’ attitudes to self-care? A mixed methods research study. *PLOS*  
608 *ONE*. 2023;18(7):e0289067.
- 609 28. Shivastava SR, Shrivastava PS, Ramasamy J. Role of self-care in management of  
610 diabetes mellitus. *Journal of Diabetes & Metabolic Disorders*. 2013;12–4.

- 611 29. Riegel, Moser DK, Buck HG, Vaughan Dickson V, Dunbar SB, Lee CS, et al. Self-Care  
612 for the Prevention and Management of Cardiovascular Disease and Stroke. Journal of the  
613 American Heart Association. 2017 Sep;6(9).
- 614 30. Contant É, Loignon C, Bouhali T, Almirall J, Fortin M. A multidisciplinary self-  
615 management intervention among patients with multimorbidity and the impact of  
616 socioeconomic factors on results. BMC Fam Pract. 2019 Dec;20(1):53.
- 617 31. Roberts S, Eaton S, Finch T. The Year of Care approach: developing a model and  
618 delivery programme for care and support planning in long term conditions within general  
619 practice. BMC Fam Pract. 2019;20(153).
- 620 32. Dures E, Hewlett S, Ambler N, Jenkins R, Clarke J, Gooberman-Hill R. Rheumatology  
621 clinicians' experiences of brief training and implementation of skills to support patient  
622 self-management. BMC Musculoskelet Disord. 2014 Dec;15(1):108.
- 623 33. Barber S, Otis M, Greenfield G, Razzaq N, Solanki D, Norton J, et al. Improving  
624 Multidisciplinary Team Working to Support Integrated Care for People with Frailty Amidst  
625 the COVID-19 Pandemic. Int J Integr Care. 2023 Jun 5;23:23.
- 626 34. Hendry A. House of Care: Enabling integrated care through collaborative care and  
627 support planning in different context and cultures. Int J Integr Care. 2021 Sep  
628 1;21(S1):352.
- 629 35. Mansour MHH, Pokhrel S, Anokye N. Effectiveness of integrated care interventions  
630 for patients with long-term conditions: a review of systematic reviews. Integ Health J.  
631 2022 Jun;4(1):e000083.

- 632 36. El-Osta A, Smith P, Leyns CC, Steinfeldt-Foss OW, Webber D. Empowerment of  
633 Community Members. In: Mezzich JE, Appleyard WJ, Glare P, Snaedal J, Wilson CR,  
634 editors. Person Centered Medicine [Internet]. Cham: Springer International Publishing;  
635 2023 [cited 2023 Aug 23]. p. 687–702. Available from:  
636 [https://link.springer.com/10.1007/978-3-031-17650-0\\_41](https://link.springer.com/10.1007/978-3-031-17650-0_41)
- 637 37. El-Osta A, Sasco ER, Barbanti E, Webber I, Alaa A, Karki M, et al. Tools for measuring  
638 individual self-care capability: a scoping review. BMC Public Health 23, 1312 (2023)  
639 <https://doi.org/10.1186/s12889-023-16194-6>. 2023;BMC Public Health(23):16194–6.
- 640 38. Our personalised care curriculum [Internet]. Personalised Care Institute; [cited 2023  
641 Sep 13]. Available from: [https://www.personalisedcareinstitute.org.uk/our-personalised-](https://www.personalisedcareinstitute.org.uk/our-personalised-care-curriculum/)  
642 [care-curriculum/](https://www.personalisedcareinstitute.org.uk/our-personalised-care-curriculum/)
- 643 39. Guthrie B, Payne K, Alderson P, McMurdo MET, Mercer SW. Adapting clinical  
644 guidelines to take account of multimorbidity. BMJ. 2012 Oct 4;345:e6341.
- 645 40. Hughes LD, McMurdo MET, Guthrie B. Guidelines for people not for diseases: the  
646 challenges of applying UK clinical guidelines to people with multimorbidity. Age Ageing.  
647 2013 Jan 1;42(1):62–9.
- 648 41. El Osta A, Webber D, Gnani S, Barnarsee R, Mummery D, Majeed A, et al. The Self-  
649 Care Matrix: A unifying framework for self-care. Self Care. 2019;10((3)):38–56.
- 650 42. Health Equity in England: The Marmot Review 10 years on [Internet]. Institute of  
651 Health Equity; 2020 [cited 3022 Mar 30]. Available from:

652 file://icnas4.cc.ic.ac.uk/sbarber/downloads/Health%20Equity%20in%20England\_The%20  
653 Marmot%20Review%2010%20Years%20On\_full%20report.pdf

654 43. Smith SM, Soubhi H, Fortin M, Hudon C, O'Dowd T. Managing patients with  
655 multimorbidity: systematic review of interventions in primary care and community  
656 settings. *BMJ*. 2012 Sep 3;345:e5205.

657 44. Kiely B, Croke A, O'Shea M, Boland F, O'Shea E, Connolly D, et al. Effect of social  
658 prescribing link workers on health outcomes and costs for adults in primary care and  
659 community settings: a systematic review. *BMJ Open*. 2022 Oct;12(10):e062951.

660

---
